# 1 **Rapid sex-specific evolution of age at maturity is** 2 **shaped by genetic architecture in Atlantic salmon**

3 **Authors:** Czorlich, Y.<sup>1,2</sup>, Aykanat T.<sup>3</sup>, Erkinaro, J.<sup>2</sup>, Orell P.<sup>2</sup> & Primmer, CR.<sup>3,4,5\*</sup>

4 Affiliations:

5 <sup>1</sup> University of Turku, Department of Biology, Itäinen Pitkätatu 4, FI-20520 Turku, Finland

6 <sup>2</sup> Natural Resources Institute Finland (Luke), POB 413, FI-90014 Oulu, Finland

7 <sup>3</sup> University of Helsinki, Organismal & Evolutionary Biology Research Programme, POB 56,  
8 FI-00014 Helsinki, Finland

9 <sup>4</sup> Institute of Biotechnology, POB 56, FI-00014 Helsinki, Finland

10 <sup>5</sup> Helsinki Institute of Sustainability Science, Faculty of Biological & Environmental  
11 Sciences, POB 56, FI-00014 Helsinki, Finland

12 \*Corresponding author: [craig.primmer@helsinki.fi](mailto:craig.primmer@helsinki.fi)

13

14

15

16

17

18

19

20

## 21 **Abstract**

22 Understanding the mechanisms by which populations adapt to their environments is a  
23 fundamental aim in biology. However, it remains challenging to identify the genetic basis of  
24 traits, provide evidence of genetic changes and quantify phenotypic responses. Age at  
25 maturity in Atlantic salmon represents an ideal trait to study contemporary adaptive evolution  
26 as it has been associated with a single locus in the *vgll3* region, and has also strongly changed  
27 in recent decades. Here, we provide an empirical example of contemporary adaptive  
28 evolution of a large effect locus driving contrasting sex-specific evolutionary responses at the  
29 phenotypic level. We identified an 18% decrease in the *vgll3* allele associated with late  
30 maturity (*L*) in a large and diverse salmon population over 36 years, induced by sex-specific  
31 selection during the sea migration. Those genetic changes resulted in a significant  
32 evolutionary response in males only, due to sex-specific dominance patterns and *vgll3* allelic  
33 effects. The *vgll3* allelic and dominance effects differed greatly in a second population and  
34 were likely to generate different selection and evolutionary patterns. Our study highlights the  
35 importance of knowledge of genetic architecture to better understand fitness trait evolution  
36 and phenotypic diversity. It also emphasizes the potential role of adaptive evolution in the  
37 trend toward earlier maturation observed in numerous Atlantic salmon populations  
38 worldwide.

## 39 **Introduction**

40 Understanding the mechanisms by which populations adapt to their environments is a  
41 fundamental aim in biology<sup>1,2</sup>. Such mechanisms may represent the only way for certain  
42 populations to persist in the face of strong human pressures and accelerated rates of climate  
43 change altering their environment. Temporal monitoring has documented recent and rapid  
44 phenotypic changes in wild populations in many species<sup>e.g. 3,4</sup>. However, whether or not such

45 phenotypic changes are adaptive often remains unclear<sup>5,6</sup>. Obtaining evidence of adaptive  
46 evolution requires knowledge of the genetic basis of traits and subsequent demonstration that  
47 natural selection induces changes in this genetic component<sup>6</sup>. Although the ideal strategy for  
48 demonstrating adaptive evolution is to study the genes directly controlling the traits under  
49 selection, such examples are extremely scarce<sup>6,7</sup>. Despite the increased availability of  
50 genomic data, the identification of large-effect loci controlling phenotypes of ecological  
51 significance and understanding how contemporary selection affects the allele frequency of  
52 such genes remains indeed challenging<sup>8</sup>. In cases where the genetic architecture of a trait is  
53 well characterized e.g. when a large-effect locus has been identified, retrospective genetic  
54 analyses of archived material for the gene(s) controlling the trait in question can be  
55 performed and provide detailed information about its evolutionary dynamics<sup>e.g. 9</sup>.

56 Age at maturity in Atlantic salmon, defined here as the number of years spent at sea prior to  
57 maturation, has recently been shown to be associated with a single large-effect locus with  
58 sex-specific effects, located within a narrow (<100kb) region around the *vgl/3* gene<sup>10</sup>. The  
59 same locus has also recently been linked with gender-biased auto-immune diseases in humans  
60<sup>11</sup>. In Atlantic salmon, age at maturity reflects a classic evolutionary trade-off, as larger, later-  
61 maturing individuals typically have higher reproductive success, but run a greater risk of  
62 mortality before first reproduction. Sex-specific selection optima may exist for this trait<sup>10</sup>.  
63 Males generally mature earlier and at smaller size, whereas females mature later and have a  
64 stronger correlation between body size and reproductive success compared with males<sup>12</sup>. It  
65 was suggested that the sex-dependent dominance observed at *vgl/3* partially resolves this  
66 sexual conflict<sup>10,13</sup>. Furthermore, the age structure of many salmon populations has changed  
67 worldwide in recent decades, generally towards an increasing proportion of smaller, earlier  
68 maturing individuals<sup>e.g. 14,15 but see 16</sup>. However, the reasons for this, and whether it is an  
69 adaptive change, remain unknown<sup>17</sup>. Therefore, age at maturity in Atlantic salmon provides a

70 rare opportunity to investigate the contemporary change of a phenotypic trait directly at the  
71 genetic level.

72 We studied a 40 year time series of two closely related Atlantic salmon populations from  
73 northern Europe with contrasting maturation age structure. Despite a low level of genetic  
74 divergence between them ( $F_{ST} = 0.012$ )<sup>18</sup>, one population (Tenojoki) displays a high level of  
75 life-history diversity including a high proportion of large, later maturing individuals in both  
76 sexes, whereas the other population (Inarijoki) consists primarily of individuals of younger  
77 maturation ages, and with less life-history variation, particularly in males<sup>15</sup>. Here, we utilized  
78 a 40 year time series to detect potential signs of adaptive evolution in age at maturity by  
79 contrasting allele frequency changes at the maturation-linked gene *vgll3* with life-history  
80 phenotypes in 2500 samples from the two populations. We also investigated the occurrence  
81 of sex- and population-specific genetic architecture and selection, potentially explaining the  
82 observed diversity variation in age at maturity.

## 83 **Results:**

### 84 **Temporal changes in age at maturity**

85 We first quantified temporal phenotypic changes in both populations. There was a non-linear  
86 decrease in the age at maturity of Tenojoki individuals, with the mean maturation age of  
87 males declining by >40% (from 2.2 to 1.3 years;  $edf = 3.87$ ,  $F = 5.11$ ,  $P < 0.001$ ) and of  
88 females by 8.1% (from 3.0 to 2.7 years;  $edf = 1.27$ ,  $F = 0.57$ ,  $P = 0.02$ ), during the 36 year  
89 time period (Figure 1a). In Tenojoki males, the decrease occurred primarily between 1971  
90 and 1987 before stabilization, while in females, age at maturity gradually decreased over the  
91 36 year study period, explained best by a slightly nonlinear slope (Figure 1a). In comparison,  
92 Inarijoki males were virtually devoid of variation in age at maturity, with almost all males  
93 having spent one year at sea before maturing ( $edf = 0.00$ ,  $F = 0.00$ ,  $P = 0.731$ ), whereas mean

94 age at maturity in females fluctuated cyclically over the 37 years ( $edf = 10.14$ ,  $F = 6.035$ ,  $P <$   
95  $0.001$ , Figure 1b), but with no indication of a decrease in average maturation age (Figure 1b).

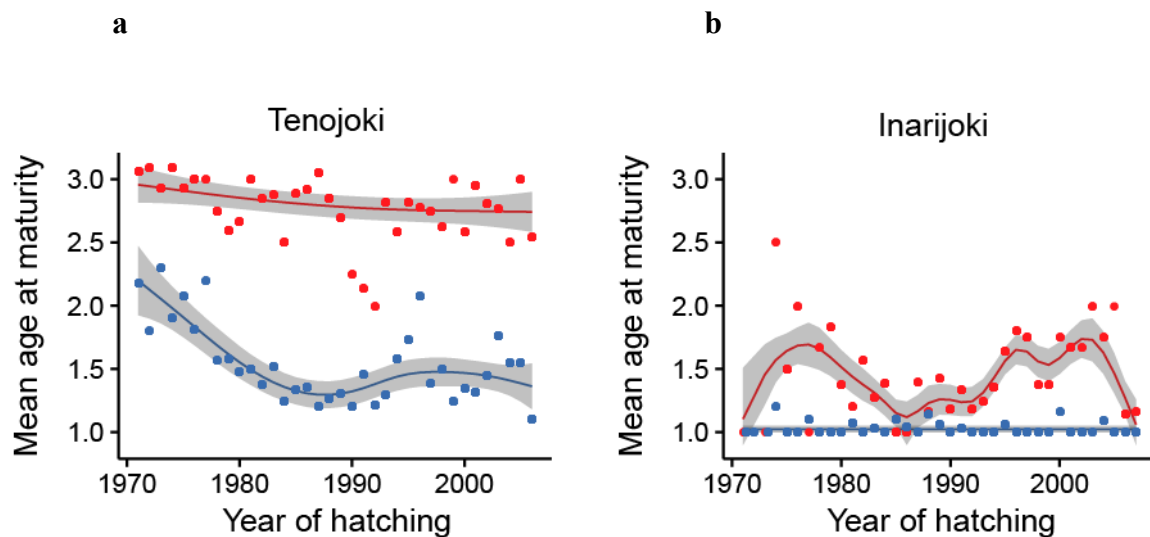

**Figure 1: Change in mean age at maturity in the a, Tenojoki and b, Inarijoki populations.**

Females are in red ( $N$  Tenojoki = 467,  $N$  Inarijoki = 261) and males in blue ( $N$  Tenojoki = 699,  $N$  Inarijoki = 570). Lines represent fitted values from the GAM  $\pm 1.96$  SE, points are observed annual means.

## 96 Genetic architecture of age at maturity

97 We hereafter use genetic architecture to refer to the additive and dominance effects of *vgll3*  
98 on age at maturity. The *vgll3* genotypes had a sex-specific effect on the probability to observe  
99 the different ages at maturity in the Tenojoki population ( $\chi^2_{(6)} = 27.58$ ,  $P < 0.001$ ). A sex-  
100 specific dominance pattern was observed in this population; heterozygote males had a mean  
101 age at maturity closer to homozygote *EE* (estimated dominance  $\delta_M = 0.09$ ,  $CI_{95} = [0.02,$   
102  $0.17]$ , see Method) whereas heterozygote females had a phenotype closer to homozygotes *LL*  
103 (estimated dominance  $\delta_F = 0.80$ ,  $CI_{95} = [0.65, 0.92]$ ; Figure 2a). In the Inarijoki population,  
104 the *vgll3* genotypes were significantly associated with the probability to observe the different

105 age at maturity groups ( $\chi^2_{(4)} = 56.41$ ,  $P < 0.001$ ) but not in a sex-specific manner ( $\chi^2_{(4)} = 8.27$ ,  
106  $P = 0.08$ ; estimated dominances of 0.13,  $CI_{95} = [0.05, 0.31]$  and 0.32,  $CI_{95} = [0.17, 0.50]$  in  
107 Inarijoki males and females, respectively). Differences in mean age at maturity between  
108 homozygotes varied depending on the sex and population (i.e. additive or allelic effect: effect  
109 of the substitution of one allele for the other). In the Tenojoki population, the relative  
110 difference in mean age at maturity between alternative *vgll3* homozygotes was about three  
111 times higher in males (+106% for *LL*, +1.17 years,  $CI_{95} = [0.99, 1.33]$ ) than in females (+32%  
112 for *LL*, +0.71 years,  $CI_{95} = [0.51, 0.91]$ ). This pattern was inverted in Inarijoki, with the  
113 relative difference in mean age at maturity between female homozygotes being about six  
114 times larger (+74% for *LL*, +0.94 years,  $CI_{95} = [0.68, 1.25]$ ) than in males (+12% for *LL*,  
115 +0.13 years,  $CI_{95} = [0.05, 0.22]$ , Figure 2b). These results imply that selection during the sea  
116 migration, defined as the relative difference in survival between genotypes, is likely to vary  
117 between sexes and populations. There was no statistically significant change in the effect size  
118 of *vgll3* on maturation age over time in either population (Tenojoki:  $\chi^2_{(6)} = 6.07$ ,  $P = 0.42$ ;  
119 Inarijoki:  $\chi^2_{(4)} = 4.41$ ,  $P = 0.35$ ).

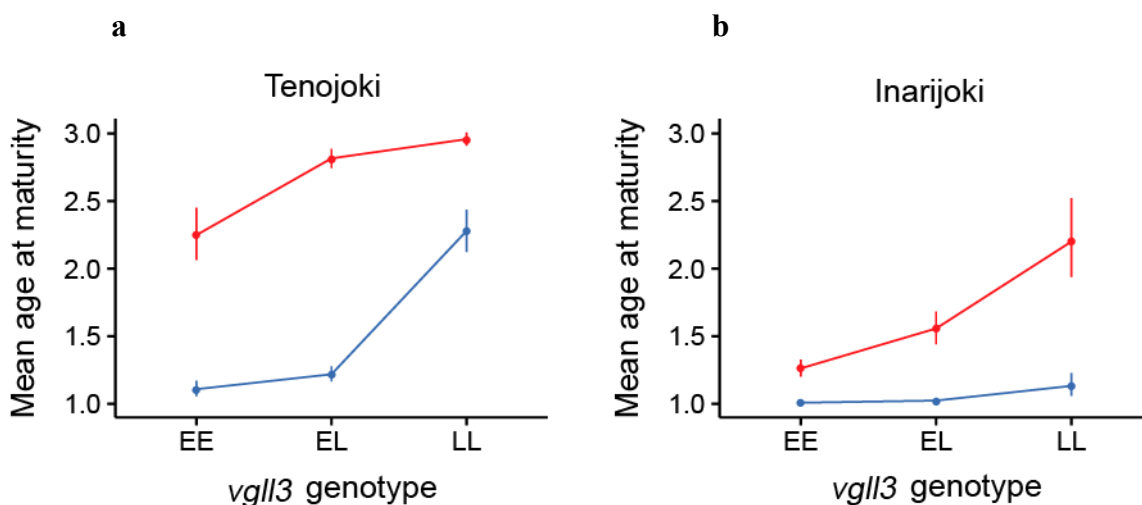

## Figure 2: Mean age at maturity as a function of *vgll3* genotype in the a, Tenojoki and b, Inarijoki populations.

Females are in red ( $N$  Tenojoki = 522,  $N$  Inarijoki = 286) and males in blue ( $N$  Tenojoki = 804,  $N$  Inarijoki = 612). Means are calculated from multinomial models fitted values, averaged over years. Error bars represents 95% bootstrap confidence intervals based on 1000 replicates.

### 120 Evolution of *vgll3* and signals of selection

121 The *vgll3* late maturing (*L*) allele frequency decreased significantly, from 0.66 to 0.54 (18%)  
122 in 36 years, in the Tenojoki population ( $F_{(1)} = 7.80$ ,  $P = 0.009$ ; log-odd slope = -0.014 ( $CI_{95} =$   
123 [-0.004, -0.024]; Figure 3a). This allele frequency change was the highest of all the 144  
124 genome-wide SNPs assessed and could not be explained by drift alone ( $P_{\Delta_{vgll3}} = 0.004$ ,  
125 Figure 3a), nor after accounting for sampling variance ( $P_{\Delta_{vgll3}} = 0.022$ ). This observation  
126 provides strong support for natural selection acting against the *vgll3* *L* allele in the Tenojoki  
127 population (see supplementary material). In the Inarijoki population, the trend in the *vgll3* *L*  
128 allele frequency was also negative (log-odd slope  $\approx -0.009$ ,  $CI_{95} = [-0.023, 0.006]$  but not  
129 significant ( $F_{(1)} = 1.29$ ,  $P = 0.26$ , Figure 3b). About 10% of the 134 genome-wide SNPs  
130 assessed had a larger change in allele frequency than *vgll3* in this population (Figure 3b).  
131 Consequently, we could not rule out drift as the basis of this change ( $P_{\Delta_{vgll3}} = 0.189$  for drift,  
132 and  $P_{\Delta_{vgll3}} = 0.292$  after accounting for sampling variance).

133 To further quantify the strength of selection driving changes in *vgll3* allele frequency, a  
134 Bayesian model was used to estimate selection coefficients whilst accounting for genetic  
135 drift, similar to a Wright-Fisher model (see Methods). The selection coefficient in the  
136 Tenojoki population was large and significantly higher than zero, albeit with large credibility  
137 intervals ( $-s = 0.33$  (95% credibility interval = [0.01, 0.77], Supplementary Figure 1). In  
138 Inarijoki, there was no evidence for significant selection ( $s = 0.25$ ,  $CI_{95} = [-0.08, 0.49]$ ).

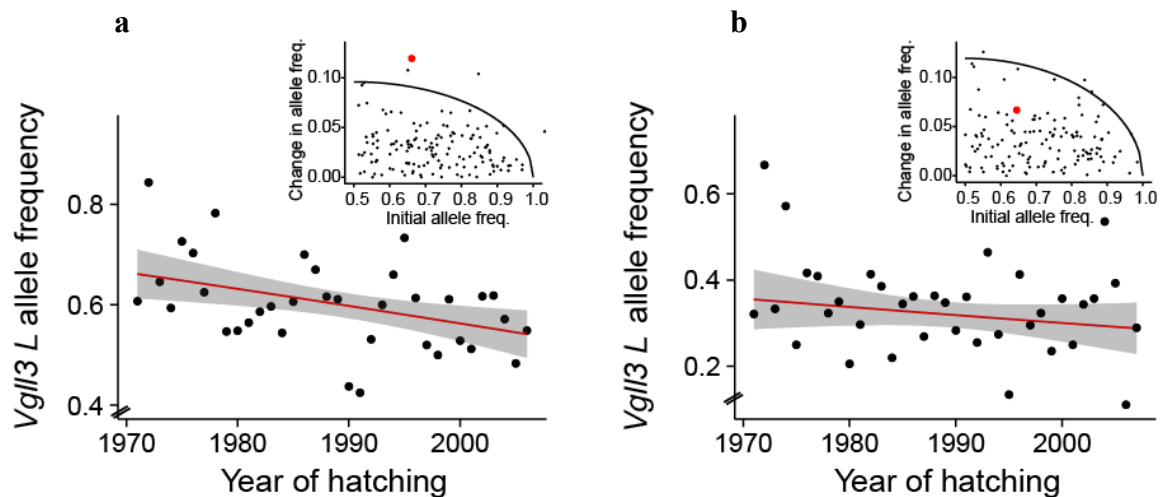

**Figure 3: Temporal changes in *vgll3* *L* allele frequency associated with late maturation in the a, Tenojoki and b, Inarijoki populations.**

The lines represent fitted values from the quasibinomial model with  $\pm 1.96$  SE ( $N$  Tenojoki = 1166,  $N$  Inarijoki = 765). The *vgll3* log-odd slope was estimated at -0.014 (CI<sub>95</sub> = [-0.004, -0.024],  $P = 0.009$ ) in Tenojoki and -0.009 (CI<sub>95</sub> = [-0.023, 0.006],  $P = 0.26$ ) in Inarijoki. Insets show the absolute estimated changes in allele frequencies of each SNP as a function of initial allele frequency in a, Tenojoki (144 loci) and b, Inarijoki (135 loci) over 36 and 37 years, respectively. The line represents the expected amount of drift at the 97.5 quantile. The *vgll3* locus is indicated in red.

139 The *vgll3* *L* allele frequency differed between sexes in a contrasting manner in the two  
140 populations. The odds of possessing an *L* allele was 37% higher in females than in males in  
141 the Tenojoki population (CI<sub>95</sub> = [0.12, 0.69],  $F_{(1)} = 8.72$ ,  $P < 0.01$ , Figure 4) but 53% lower in  
142 Inarijoki (CI<sub>95</sub> = [0.40, 0.65],  $F_{(1)} = 36.51$ ,  $P < 0.001$ , Figure 4). This could be the result of  
143 either sex- and genotype-specific fertilization ratio or juvenile mortality in freshwater, or  
144 alternatively, selection at the *vgll3* locus differing between the sexes during sea migration,  
145 prior to returning to reproduce. In order to distinguish the latter possibility (selection at sea)  
146 from options involving selection during the freshwater phase we genotyped 143 and 108  
147 juveniles of various ages collected from the same freshwater locations in Tenojoki and  
148 Inarijoki (1-3 years old, see Methods), respectively. Juvenile sex ratios were close to parity  
149 and the *vgll3* *L* allele frequency was similar in both sexes in both populations ( $\chi^2_{(1)} = 3.27$ ,  $P$   
150 = 0.07 in Tenojoki,  $\chi^2_{(1)} = 0.04$ ,  $P = 0.85$  in Inarijoki, Figure 4). This provides support for the  
151 notion that selection strength acting on the *L* allele varies in a sex-specific manner during the



152 marine life-history phase, as opposed to during the freshwater juvenile phase. Such sex-  
153 specific allele frequency patterns may be reinforced by sex-specific dominance  
154 (Supplementary Figure 2).

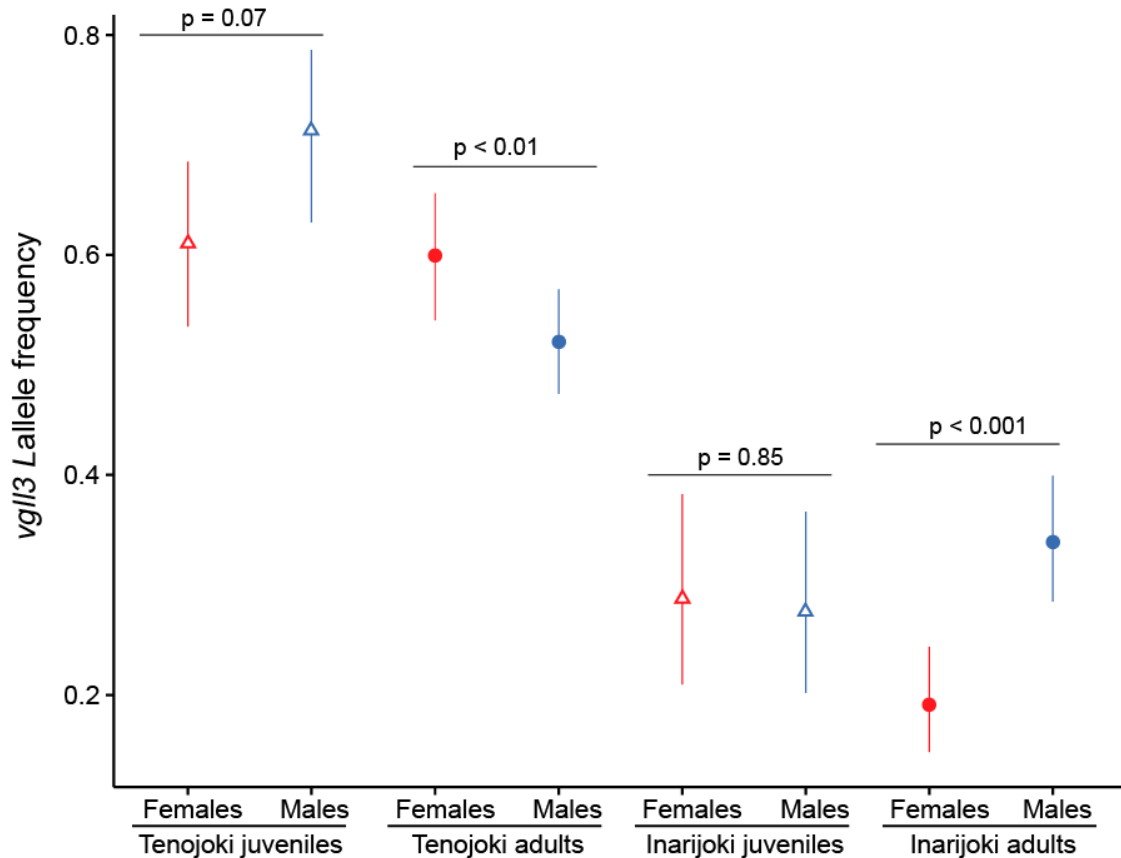

**Figure 4: Model predicted mean *vgII3 L* allele frequency as a function of the sex and reproductive status in Tenojoki and Inarijoki.**

Error bars indicate 95% confidence intervals. Adult allele frequencies are from years 2006 and 2007 for females (red circles) and males (blue circles), respectively, in the Tenojoki and Inarijoki populations. Juveniles allele frequencies (triangles) are from 2012 in Tenojoki (2-3 years old) and 2016 in Inarijoki (1-3 years old).

#### 155 **Sex-specific evolutionary response**

156 In Tenojoki, the sex-specific genetic architecture drove contrasting evolutionary responses in  
157 the two sexes. Temporal changes in genotypes explained about 50% of the non-linear  
158 decrease in male age at maturity (0.46 years,  $edf = 3.95$ ,  $F = 3.51$ ,  $P < 0.001$ ; Supplementary

159 Figure 3) but didn't explain the temporal changes in female age at maturity (0 years,  $edf = 0$ ,  
160  $F = 0.00$ ,  $P = 0.54$ ). Temporal changes in genotype frequencies were similar between sexes  
161 ( $\chi^2_{(2)} = 2.78$ ,  $P = 0.25$ ) and were thus unlikely to be the main driver of those sex-specific  
162 evolutionary responses. On the other hand, both the dominance patterns and *vgll3* effect sizes  
163 varied greatly between sexes (Figure 2a) and could contribute to the different responses. For  
164 instance, an individual with the *EE* genotype rather than *LL* matures, on average, 0.71 ( $CI_{95} =$   
165  $[0.51, 0.91]$ ) or 1.17 ( $CI_{95} = [0.99, 1.33]$ ) years earlier, depending whether it is a female or a  
166 male. The extent of the phenotypic response thus differs between the sexes for a similar *EE*  
167 genotype frequency change. Further, because of sex-specific dominance, the phenotypic  
168 response to a change in heterozygote frequency will also vary between the sexes. For  
169 example in Tenojoki females, the phenotypic change induced by a decrease in the *LL*  
170 genotype frequency would be partially compensated by the increase in the *EL* genotype  
171 frequency, which results in a similar phenotype distribution due to the dominance of the *L*  
172 allele (Figure 2a, Supplementary Figure 4). In contrast, in males, the recessivity of the *vgll3 L*  
173 allele ( $\delta_M = 0.09$ ) would favor a larger decrease in age at maturity when the proportion of *EL*  
174 heterozygotes is increasing. Most of the observed decline in female age at maturity could be  
175 explained by the spawning year (0.20 year,  $edf = 2.16$ ,  $F = 21.61$ ,  $P < 0.001$ ). The year effect  
176 also explained a part of the decline in male age at maturity (0.15 year,  $edf = 2.126$ ,  $F =$   
177  $12.41$ ,  $P < 0.001$ ).

## 178 Discussion

179 We provide convincing evidence of rapid adaptive evolution of age at maturity toward small,  
180 early-maturing individuals in a large Atlantic salmon population. This indicates that despite  
181 having a reproductive advantage due to their large size<sup>12,19</sup>, the late maturation life-history  
182 strategy has become increasingly costly and modified the reproductive success vs survival

183 trade-off such that earlier maturation is increasingly advantageous. Adaptive evolution may  
184 thus represent a realistic mechanism behind changes towards earlier age at maturity observed  
185 worldwide in the last decades in Atlantic salmon <sup>e.g. 14–16,20</sup> and other salmonid fish species <sup>e.g.</sup>  
186 <sup>21</sup>. What could be the causes of such rapid evolution of a life-history trait? One explanation is  
187 that it could be linked to recent rapid changes in the marine environment of the Teno salmon  
188 populations. For example, climate change may negatively affect Atlantic salmon marine  
189 growth and/or survival directly <sup>e.g. 22</sup> or indirectly through changes in Arctic food-webs and  
190 ecosystem functioning resulting from e.g. species range expansions <sup>20,23,24</sup>. Atlantic salmon  
191 occupying the northernmost parts of the globe will be unable to move to a colder climate in  
192 response to ocean warming, which would reinforce the importance of adaptation for  
193 population persistence. Another possibility is human-induced evolution of age at maturity  
194 through fishing targeting Atlantic salmon differentially according to their size, and therefore  
195 age at maturity <sup>e.g. 25, but see 26</sup>, or reducing prey abundance <sup>e.g. 27</sup>. Such environmental changes  
196 and/or human-induced pressure could negatively affect salmon survival at sea and thus  
197 increase the cost of late maturation, thereby potentially tipping the selective balance such that  
198 the size advantage at reproduction stemming from spending additional years at sea no longer  
199 compensates for the increased mortality and thus drives evolution towards younger  
200 maturation age. It is important to note however, that natural selection didn't entirely explain  
201 the observed temporal changes in age at maturity in the Tenojoki population. Irrespective of  
202 the *vgll3* genotypes, the probability to mature at younger ages, after one or two years at sea,  
203 increased over time (Supplementary Information). This could be due to adaptive phenotypic  
204 plasticity <sup>28</sup>, through changes in maturation probability towards the same direction as  
205 selection, or to changes in allele frequencies of, as yet unknown, smaller effect loci. Further  
206 investigation is required to test these hypotheses. Regardless, such changes in population age  
207 structure can negatively affect the population growth rate and/or temporal stability induced

208 via portfolio effects <sup>e.g.</sup> <sup>29</sup> and also have negative consequences on genetic diversity levels <sup>e.g.</sup>  
209 <sup>30</sup> and thus are a concern for future population persistence.

210 Despite common temporal changes in *vgll3* allele frequency between the sexes, differing  
211 genetic architectures, in terms of additive and dominance patterns, contributed to sex-specific  
212 selection strengths and evolutionary responses to selection. We observed sex-specific  
213 differences in *vgll3* allele frequencies in adult salmon that were not present in pre-marine-  
214 migration juveniles from the same populations (Figure 4). Interestingly, the direction of the  
215 sex-specific differences was opposite in the two populations studied. The combined effects of  
216 sex-dependent dominance and sex-specific selection patterns can explain these contrasting  
217 patterns. Indeed, large between-populations variation in *vgll3* effects on age at maturity may  
218 influence selection and adaptive responses of individuals. The relative strength of allelic  
219 effects differed dramatically between sexes and these effects were in opposite directions in  
220 the two populations: in Inarijoki, the difference in mean age at maturity between  
221 homozygotes is about six times larger in females compared to males whereas in Tenojoki, the  
222 relative difference was three times higher in males (Figure 2). Therefore, selection against *LL*  
223 genotype individuals acts primarily on females in Inarijoki, but on males in Tenojoki (Figure  
224 4, Supplementary material). However, sex-specific dominance also plays a role by  
225 introducing differences in allele frequencies between sexes that are dependent on population  
226 allele frequency (Supplementary Figure 2). Furthermore, sex-specific genetic architectures  
227 induce sex-specific evolutionary responses in Tenojoki, by accelerating the decrease in age at  
228 maturity in males and reducing the temporal phenotypic variation in females. Sex-specific  
229 dominance is likely to have evolved to reduce intra-locus sexual conflict <sup>10</sup>. However,  
230 whether this genetic architecture is presently at its optimum is questionable in light of the  
231 quick decrease in *vgll3 L* allele frequency and age at maturity. Further studies are necessary  
232 to determine whether sexually antagonistic selection in Tenojoki is persisting in ever

233 changing environments and to describe the extent, origin and consequences of among  
234 population variation in genetic architecture.

235 Age at maturity evolved rapidly under sex-specific selection in just 36 years, equivalent to 4-  
236 6 generations in Atlantic salmon. Despite being genetically similar, the two studied  
237 populations had distinctive genetic architectures, sex-specific selection and consequently  
238 *vgll3* allele frequencies variation. This study shows that variability in genetic architectures  
239 can create complex selection and evolutionary patterns between sexes and populations. This  
240 highlights the importance of determining the genetic basis of fitness traits in order to better  
241 understand their evolution and to explain the phenotypic diversity observed between  
242 populations and species.

## 243 **Material and methods**

### 244 **Study site and sampling**

245 The subarctic Teno River forms the border between Finland and Norway and drains north into  
246 the Barents sea (68 - 70°N, 25-27°E). Genetically distinct salmon populations<sup>31</sup> are  
247 distributed throughout the 16 386 km<sup>2</sup> catchment area. Annual river catches range from about  
248 20,000 to 60,000 individuals, representing up to 20% of the entire riverine Atlantic salmon  
249 harvest in Europe<sup>32</sup>. Atlantic salmon populations from Teno have been monitored since early  
250 1970s with collections of scales and phenotypic information by trained fishers<sup>15,33</sup>. Scales  
251 were stored in envelopes at room temperature and used to determine individual life-history  
252 characteristics including the number of years spent in the freshwater environment prior to  
253 smoltification (river age), number of years spent in the marine environment prior to  
254 maturation (sea age) and possible previous spawning events, following international  
255 guidelines (ICES 2011). The Teno river Atlantic salmon have diverse life history strategies  
256<sup>15,35</sup>. They can spend from two to eight years in freshwater before smoltifying, from one to

257 five years at sea before maturing and have up to five breeding attempts. Overall, a total of  
258 120 combinations of river age, sea age at maturity and repeat spawning strategies have been  
259 described<sup>15</sup>. Age at maturity has been declining in Teno salmon over the last 40 years, with  
260 proportionally fewer late maturing salmon returning over years. Age at maturity also differs  
261 largely among populations displaying genomic signatures of local adaptation<sup>15,33</sup>.

262 We randomly selected scales from individuals caught by rod between 1972 and 2014 during  
263 the later part of the fishing season, from July 20 to August 31. Most of the Teno salmon are  
264 expected to have reached their home river by late July<sup>36</sup>. Samples came from two different  
265 locations, the middle reaches of the Tenojoki mainstem (hereafter Tenojoki) and a headwater  
266 region Inarijoki (Supplementary Figure 5). These sections of the river host weakly  
267 differentiated salmon populations with contrasting sea-age structure at maturity<sup>31,33</sup>.

268 Individuals from the Tenojoki spend, on average, more time at sea before maturing than  
269 individuals from the Inarijoki population<sup>15,30</sup>. Seventy additional females were selected in  
270 Inarijoki over the study period, by following the same sampling scheme, to increase the  
271 sampling size in analyses with sex-specific estimates. Scale or fin samples were also  
272 collected from juvenile salmon from the Tenojoki (N=143, 2-3 years old) and Inarijoki  
273 (N=108, 1-3 years old) populations caught by electrofishing in the 2012 and 2016,  
274 respectively. They were used as the baseline for population assignment of adults and to  
275 determine potential sex-specific *vgll3* allele frequency differences at the juvenile stage.

## 276 **Genotyping**

277 DNA extraction from scales, sex determination and genotyping were performed following<sup>37</sup>.  
278 In total, 2482 individuals were genotyped at 191 SNPs, including the SNP the most highly  
279 associated with the age at maturity, *vgll3TOP* (vestigial-like family member 3 gene also  
280 called *vgll3*,<sup>10</sup>) and outlier and baseline SNP modules<sup>37</sup>. The outlier module consisted of 53

281 SNPs highly differentiated between the Inarijoki and Tenojoki populations, thus allowing a  
282 more powerful assignment of population of origin, between these two closely related  
283 populations <sup>i.e. see 30,37</sup>. The baseline module included 136 putatively neutral markers in low  
284 linkage disequilibrium, distributed over the whole genome proportionally to chromosome  
285 length, previously filtered to have minor allele frequency >0.05 and heterozygosity >0.2<sup>37</sup>.  
286 These SNPs were used to estimate the level of differentiation among populations of the Teno  
287 River (Weir and Cockerham's  $F_{ST}$ ) and genetic drift. Mean genotyping success was on  
288 average 0.80 per locus and individual.

## 289 **Population assignment**

290 The 53 outlier loci were used to determine the optimum number of genetic clusters and assign  
291 the population of origin of adults using the software STRUCTURE. First, an admixture  
292 model with correlated allele frequencies <sup>38</sup> was run on adult and juvenile data for 80,000  
293 MCMC iterations, including a burn-in length of 50,000. The model was replicated six times  
294 for each cluster value K, varying from one to four. The optimal number of clusters was  
295 thereafter estimated using the  $\Delta K$  method described in Evanno, Regnaut, and Goudet (2005)  
296 using STRUCTURE HARVESTER <sup>40</sup>. This allowed us to determine whether juveniles were  
297 correctly assigned to their sampling locations and could thus be used as a baseline for adult  
298 assignment. Then another admixture model with correlated allele frequencies was replicated  
299 six times on adult data using juvenile data as a baseline, with prior migration set to 0. The  
300 *fullsearch* algorithm from the CLUMP software (Jakobsson & Rosenberg 2007) was used to  
301 account for across replicate variability in membership coefficients. Finally, the cluster of each  
302 adult was assigned by using the optimum K and membership probability superior or equal to  
303 0.8. The differentiation between populations was tested by calculating the likelihood ratio G-

304 statistic<sup>41</sup> and comparing it with the G-statistic distribution obtained by permuting 1,000  
305 times individuals between populations.

306 The most likely number of clusters determined with the  $\Delta K$  method was two when juveniles  
307 and adults data were combined (Supplementary Figure 6Supplementary Figure 6). Juveniles  
308 were assigned accordingly to their sampling location in more than 96% of cases  
309 (Supplementary Figure 7). Using juvenile data as a baseline, 90% of adults were classified to  
310 one of the two clusters with probabilities equal or higher than 0.8. Individuals sampled in  
311 Tenojoki were assigned to the Inarijoki population in 25% of the cases whereas only 2% of  
312 the individuals caught in Inarijoki were assigned to the Tenojoki population. In total, 1330  
313 and 911 individuals clustered in the Tenojoki and Inarijoki populations, respectively  
314 (Supplementary Figure 8). The two populations were significantly genetically differentiated  
315 ( $F_{ST} = 0.013$ ,  $G = 201.55$ ,  $P < 0.01$ ) and had contrasted age structures (Supplementary Figure  
316 9).

## 317 **Statistical analyses**

### 318 **Temporal variation in age at maturity and proportion of females**

319 Non-linear temporal variation in age at maturity was estimated separately for each population  
320 using generalized additive models, with the Gaussian family as the residual distribution. Year  
321 of hatching was included as an independent variable inside a cubic regression spline for each  
322 sex. The study included spawning individuals caught over a 43 year period (1972 to 2014).  
323 Hatch years were calculated based on the specific life-history strategy of each individual and  
324 spanned the period from 1971 to 2006 in Tenojoki and 1971 to 2007 in Inarijoki. Sex was  
325 also included as an explanatory variable.



326 The amount of smoothing was determined in each case using the maximum likelihood  
327 method. Automatic smoothness selection was performed by adding a shrinkage term. The  
328 significance of independent variables was assessed using F-tests and an alpha risk of 0.05. All  
329 statistical tests included in this manuscript were two-tailed. The additive models were run with  
330 the R package *mgcv*<sup>42,43</sup>.

### 331 **Effect size of *vgll3* on age at maturity**

332 To estimate the genetic effect of *vgll3*, age at maturity was also regressed using a multinomial  
333 model separately for each population. In Tenojoki, two individuals having matured after five  
334 years at sea were considered having matured after four years to avoid the estimate of  
335 additional model parameters without data support. The sex, year of capture and *vgll3*  
336 genotype can all influence age at maturity and were included in models as a three-way  
337 interaction. Multinomial models in this study were performed using the R package *nnet*<sup>44</sup>.  
338 Model selection was performed using backward selection with F-tests and by calculating the  
339 AICc of all possible models. The effect of year on the probability to mature was calculated  
340 with the *Effect* package<sup>45</sup> which averages the effect size across sexes and genotypes. The  
341 mean age at maturity per sex and genotype was calculated from model predicted values. First,  
342 predicted age was obtained for each year, sex and age at maturity combination by multiplying  
343 the probabilities of having matured after one, two, three or four years at sea by the  
344 corresponding sea age at maturity and taking the sum. Second, the age at maturity was  
345 calculated for each sex and genotype by averaging over years. This process was replicated  
346 1000 times by randomly sampling with replacement and fitting a new model. A 95%  
347 bootstrap confidence interval was then determined by taking values of the 2.5 and 97.5  
348 percentiles. The *vgll3* alleles were called *L* and *E* to indicate their association with late and  
349 early maturation, respectively<sup>10</sup>. Dominance for each sex and population was estimated from

350 the mean age at maturity ( $\mu$ ) following  $\delta = \frac{\mu_{EL} - \mu_{EE}}{\mu_{LL} - \mu_{EE}}$ . The *L* allele is recessive if  $\delta = 0$ ,

351 additive if  $\delta = 0.5$  and dominant if  $\delta = 1$ .

352 To determine how much of the observed changes in age at maturity over time could be

353 attributed to changes in genotypes and year of capture, a new dataset with the spawning year

354 held constant at 1975 was created for Tenjoki. The previous multinomial model was used to

355 predict new maturation probabilities from which model predicted age at maturity were

356 calculated for each individual, as above. Temporal changes in age at maturity attributed to

357 genotypes were determined by fitting a generalized additive model using the Gaussian family

358 and including the individual hatch year in a cubic regression spline and the sex as

359 independent variable. Changes in age at maturity attributed to the year of capture

360 corresponded to the difference between individual predicted age at maturity calculated from

361 the original dataset and the one with the year fixed. Another Gaussian generalized additive

362 model was also performed on those differences, by including the hatch year in a cubic

363 regression spline. Automatic smoothness selection was performed by adding a shrinkage

364 term.

### 365 **Change in allele and genotype frequencies**

366 Temporal variation in allele frequencies was determined for each population and locus using

367 generalized linear models (*glm*), with the quasibinomial family to account for overdispersion.

368 Sex-dependent *vgll3* genetic effect on the age at maturity<sup>10</sup> may create sex-specific selection

369 at sea, leading to differences in *vgll3* allele frequency between male and female spawners

370 from the same generation. The sex variable can capture this potential intra-generation

371 variation in allele frequency. Hence, sex and year of hatching were included as independent

372 variables in the *glm*. To keep the potential effect of sex-specific selection on the *vgll3* allele

373 frequency temporal change, the model was also run without including sex as a covariate. The  
374 significance of variables was assessed with F-tests.

375 In order to determine whether *vgll3* allele frequencies varied across time more than under the  
376 neutral expectation, model predicted temporal changes in allele frequencies were compared  
377 among loci with individual genotyping success higher than 0.7 (144 and 135 loci for the  
378 Tenojoki and Inarijoki populations, respectively). This threshold was chosen as a trade-off  
379 between increasing the quality and amount of data per locus (average genotyping success  
380 superior to 0.90 in those subsets) and keeping a large number of loci for the comparison  
381 (~25-30% of loci were excluded). The amount of genetic drift, and thus random temporal  
382 allele frequency change, is dependent on the initial allele frequency of each locus<sup>46</sup>. The  
383 comparison of temporal changes between *vgll3* and other putatively neutral loci was thus  
384 corrected for initial allele frequency by calculating the expected amount of drift at *vgll3* under  
385 a Wright-Fisher model<sup>47,48</sup>. The distribution of allele frequency  $x(t)$  after  $t$  generations can  
386 be approximated using a normal distribution<sup>46</sup>:

$$x(t)|x(0) \sim \text{Normal} \left( x(0), x(0)(1 - x(0)) \frac{t}{2N} \right)$$

387 with  $x(0)$  being the initial allele frequency and  $N$  the effective population size. The ratio  
388  $\zeta = \frac{t}{2N}$  was estimated with a Bayesian model using a uniform prior distribution ranging from  
389 0 to 1. The binomial fitted allele frequencies at birth for years 1971 ( $x(0)$ ) and 2006 ( $x(t)$ ) in  
390 Tenojoki and 1971 ( $x(0)$ ) and 2007 ( $x(t)$ ) in Inarijoki were used as data for all loci except  
391 *vgll3*. Two MCMC chains were run for 100,000 iterations with thinning interval 10, and a  
392 burn-in length of 100,000. Convergence was assessed using the Gelman and Rubin's  
393 convergence diagnostic<sup>49</sup> and a potential scale reduction factor (*psrf*) threshold of 1.1. The  
394 probability to observe the *vgll3* allele frequency change ( $\Delta_{vgll3} = |x(t)_{vgll3} - x(0)_{vgll3}|$ )

395 under drift alone was calculated at each of the 20,000 saved iterations ( $i$ ) to account for  
396 uncertainty in  $\zeta$  estimation as follows:

$$P_{\Delta_{vgll3}} = \frac{1}{20000} \sum_{i=1}^{20000} [\Delta_{drift\ i} \geq \Delta_{vgll3}]$$

397 with

$$\Delta_{drift\ i} = |x(t)_i | x(0)_{vgll3} - x(0)_{vgll3}|$$

398 and

$$x(t)_i | x(0)_{vgll3} \sim Normal(x(0)_{vgll3}, x(0)_{vgll3}(1 - x(0)_{vgll3})\zeta_i)$$

399 To account further for uncertainty in  $vgll3$  allele frequency change,  $\Delta_{vgll3}$  was re-estimated at  
400 each iteration  $i$  by running the quasi-binomial model with a new dataset, sampled for each  
401 year from the original dataset with replacement. The distribution of changes expected under  
402 drift alone was also calculated in the same manner as for  $vgll3$ , for initial allele frequencies  
403  $x(0)$  varying from 0.5 to 1.

404 To determine whether potential differences in  $vgll3$  allele frequencies between adult males  
405 and females are likely to arise during the sea migration, juvenile allele frequencies were  
406 analyzed using a separate *glm* with the binomial family for each population. Sex was  
407 introduced as an independent variable. A backward model selection was performed using  
408 Likelihood-Ratio Tests (LRT) and an alpha risk of 0.05. Confidence intervals were calculated  
409 with the *lsmean* package<sup>50</sup> by taking the years 2006 and 2007 as reference for the Tenojoki  
410 and Inarijoki adults, respectively.

411 To further describe temporal changes in  $vgll3$  genotypes, a multinomial model was used for  
412 each population. The year of hatching and the sex were introduced as independent variables

413 in a two way interaction. A backward model selection was performed using LRT and an  
414 alpha risk of 0.05.

415 Allele frequencies may differ between sexes due to sex-specific selection between  
416 homozygotes but also because of the effect of sex-specific dominance, even when selection is  
417 sex-independent. To determine how dominance can contribute to differences in allele  
418 frequencies between sexes in the latter case, the expected sign and magnitude of allele  
419 frequency differences were determined for different selection strengths, by using the  
420 dominance patterns calculated previously for the Inarijoki and Tenojoki populations.  
421 Considering a gene with 2 alleles  $A$  and  $B$  with respective frequencies  $p$  and  $q$ , the allele  
422 frequency after a selection event corresponds to:

$$p_s = \frac{p^2 W_{AA} + pq W_{AB}}{p^2 W_{AA} + 2pq W_{AB} + q^2 W_{BB}}$$

423 with  $W_{AA}$ ,  $W_{AB}$  and  $W_{BB}$  the relative fitness of each respective genotype:

$$424 \quad W_{AA} = 1; \quad W_{AB} = 1 - DS \quad \text{and} \quad W_{BB} = 1 - S.$$

425 where  $S$  is the selection coefficient common to each sex, varying from 0 to 0.90 by 0.15  
426 intervals.  $D$  is the dominance coefficient.  $P_s$  was calculated for each sex and population using  
427 the corresponding dominance coefficients previously calculated from phenotypes ( $\delta$ ) and an  
428 initial  $p$  varying from 0 to 1. The expected difference in allele frequency in Supplementary  
429 Figure 2 corresponds to  $p_s(\text{female}) - p_s(\text{male})$ , calculated for each combination of  $S$  and  $p$ .

### 430 **Estimation of selection coefficients**

431 A Bayesian model was used to estimate selection coefficients by accounting for drift induced  
432 by a limited number of spawners, in a similar way to Wright-Fisher models <sup>e.g. 51,52</sup>.

433 First, the linkage disequilibrium method<sup>53</sup> implemented in the software NeEstimator 2.01<sup>54</sup>  
434 was applied on samples grouped by cohort year to estimate the parental effective number of  
435 breeders ( $N_b$ ). This approach was favored over the standard temporal method potentially  
436 generating biased effective size estimates when used with temporally close samples from  
437 species with overlapping generations<sup>55</sup> and only providing information about the harmonic  
438 mean of effective sizes. In order to use the linkage disequilibrium  $N_b$  values and associated  
439 95% parametric confidence intervals in the Bayesian models, parameters of log-normal  
440 distributions with similar percentiles were assessed using the R package *rriskDistributions*<sup>56</sup>.  
441 Weights of 7, 2 and 1 were respectively assigned to the 2.5, 5.0 and 97.5 percentiles to  
442 increase the approximation precision for lower bounds and medians. The negative or infinite  
443 values were replaced by 5000 or 10 000 for the median and 95% confidence interval upper  
444 bound, respectively. These are realistic maximum breeder numbers in the populations and  
445 represent a conservative approach. If the lower bound also displayed infinite values, the  
446 corresponding distribution had a median of 9 000 and lower and upper bounds of respectively  
447 8 000 and 10 000.

448 The selection coefficient represents “the reduction in relative fitness, and therefore genetic  
449 contribution to future generations, of one genotype compared to another”<sup>57</sup>. Selection  
450 coefficients were estimated using 32 and 33 different spawning years, with corresponding  
451 hatch years, for Tenojoki and Inarijoki, respectively. Considering a SNP with alleles A1 and  
452 A2 and  $W_y^{11} = 1$ ,  $W_y^{12} = 1 - DS$  and  $W_y^{22} = 1 - S$  being the relative fitness of each  
453 genotype.  $S$  corresponds to the selection coefficient, following a uniform prior distribution  
454 ranging from -1 to 1.  $D$  denotes the dominance coefficient, following a uniform prior  
455 distribution ranging from 0 to 1. The observed number of each genotype  $g$  in spawners of sex  
456  $s$  in year  $y$  ( $O_{g,s,y}$ ) followed a Dirichlet Multinomial (DM) distribution:

$$O_{g,s,y} \sim DM(T_{s,y}, g_{s,y}^{11} \dots g_{s,y}^{22}, \eta)$$

457 where  $\eta$  is the variation parameter following a uniform distribution ranging from 1 to 2500  
 458 and  $T_{s,y}$  the total number of spawners per sex and year. The spawners genotype frequency for  
 459 each sex ( $g_{s,y}^{11} \dots g_{s,y}^{22}$ ) varied over years according to a hierarchical model,  
 460  $g_{s,y}^{11} \dots g_{s,y}^{22} \sim \text{dirichlet}(\mu g_s^{11} \dots \mu g_s^{22}, \eta)$  and  $\mu g_s^{11} \dots \mu g_s^{22} \sim \text{dirichlet}(1,1,1)$ . The observed number  
 461 of allele A1 ( $n_y$ ) in individuals born in year  $y$  follow a binomial distribution:

$$n_y \sim \text{Binomial}(p_y, 2 N_y)$$

462 with  $N_y$  being the total number of individuals per year and  $p_y$  the population allele frequency.  
 463 The expected allele frequency in the cohort  $y$  depends on genotype frequency in spawners the  
 464 year before as follows:

$$E[p_y] = \frac{g_{y-1}^{11} W^{11} + 0.5 g_{y-1}^{12} W^{12}}{\bar{W}}$$

465 with  $\bar{W}$  being the population mean fitness  $\bar{W} = g_{y-1}^{11} W^{11} + g_{y-1}^{12} W^{12} + g_{y-1}^{22} W^{22}$ .  $g_{y-1}^{11}$ ,  
 466  $g_{y-1}^{12}$  and  $g_{y-1}^{22}$  are the genotypes of spawners averaged across sexes, as each sex contributes  
 467 equally to the next generation despite a potential biased sex-ratio. Genetic drift should be  
 468 taken into account to estimate  $p_y$  from the genotype frequencies of the previous year's  
 469 spawners. In populations with random mating, it corresponds to drawing randomly  $p_y$  from a  
 470 binomial distribution<sup>46-48</sup> with as parameters the expected allele frequency  $E[p_y]$  and twice  
 471 the effective number of spawners, previously estimated with the linkage disequilibrium  
 472 method ( $2 N b_y$ ). Consequently, the expected variance of the allele frequency  $p_y$  subject to  
 473 drift is after one generation  $\text{Var}(p_y) = \frac{p_y(1-p_y)}{2 N b_y}$ . For computing time and convergence  
 474 reasons, a beta distribution with equal mean and variance was used instead:

$$p_y \sim \text{Beta}(\alpha, \beta)$$

475 with

$$476 \quad \alpha = \frac{E[p_y](\text{var}(p_y) + E[p_y]^2 - E[p_y])}{\text{var}(p_y)} \quad \text{and} \quad \beta = \frac{(\text{var}(p_y) + E[p_y]^2 - E[p_y])(E[p_y] - 1)}{\text{var}(p_y)}$$

477 Priors used in this model were chosen to be as uninformative as possible. For the *vgll3* locus,  
478 the *L* allele was chosen as reference. The “pMCMC” were calculated from the two chains as  
479 following:  $2 * \min(p < 0; 1 - p < 0)$ ,  $p < 0$  being the proportion of values below zero.

480

481 Posterior distributions were approximated using Monte Carlo Markov Chain (MCMC)  
482 methods with the Just Another Gibbs Sampler software (JAGS<sup>58</sup>) run in the R environment  
483<sup>43</sup>. Two MCMC chains were run for 4.5 million iterations, including a burnin length of 3.5  
484 million. Only one iteration out of 100 was kept to reduce the memory size used. Gelman and  
485 Rubin’s convergence diagnostic<sup>49</sup> was used to assess convergence. Models were run longer if  
486 the potential scale reduction factor (*psrf*) was initially superior to 1.10. Finally, all models  
487 had potential scale reduction factor inferior or equal to 1.10 for all parameters, except for up  
488 to 2 *Nb<sub>y</sub>* parameters in 10 models for Inarijoki, having larger *psrf* (inferior to 1.30).

489 **Data and code availability:**

490 The datasets used during the current study will be uploaded to a public data repository upon  
491 acceptance.

492 **Code availability:**

493 The custom codes used during the current study are available from the corresponding author  
494 on reasonable request.



## 495 References

- 496 1. Losos, J. B. Ecological character displacement and the study of adaptation.  
497 *Proceedings of the National Academy of Sciences of the United States of America* **97**,  
498 5693–5695 (2000).
- 499 2. Andrew, R. L. *et al.* A road map for molecular ecology. *Molecular Ecology* **22**, 2605–  
500 2626 (2013).
- 501 3. Sharpe, D. M. T. & Hendry, A. P. Life history change in commercially exploited fish  
502 stocks: An analysis of trends across studies. *Evolutionary Applications* **2**, 260–275  
503 (2009).
- 504 4. Teplitsky, C. & Millien, V. Climate warming and Bergmann’s rule through time: Is  
505 there any evidence? *Evolutionary Applications* **7**, 156–168 (2014).
- 506 5. Gienapp, P., Teplitsky, C., Alho, J. S., Mills, J. A. & Merilä, J. Climate change and  
507 evolution: Disentangling environmental and genetic responses. *Molecular Ecology* **17**,  
508 167–178 (2008).
- 509 6. Merilä, J. & Hendry, A. P. Climate change, adaptation, and phenotypic plasticity: The  
510 problem and the evidence. *Evolutionary Applications* **7**, 1–14 (2014).
- 511 7. Merilä, J. & Hoffmann, A. A. Evolutionary Impacts of Climate Change. *Oxford*  
512 *Research Encyclopedia of Environmental Science* **1**, 1–17 (2016).
- 513 8. Savolainen, O., Lascoux, M. & Merilä, J. Ecological genomics of local adaptation.  
514 *Nature Publishing Group* **14**, 807–820 (2013).
- 515 9. Crnokrak, P. & Roff, D. A. Dominance variance: Associations with selection and  
516 fitness. *Heredity* **75**, 530–540 (1995).
- 517 10. Barson, N. J. *et al.* Sex-dependent dominance at a single locus maintains variation in  
518 age at maturity in salmon. *Nature* **528**, 405–408 (2015).
- 519 11. Liang, Y. *et al.* A gene network regulated by the transcription factor VGLL3 as a  
520 promoter of sex-biased autoimmune diseases. *Nature Immunology* **18**, 152–160 (2017).
- 521 12. Fleming, I. A. Reproductive strategies of Atlantic salmon: ecology and evolution.  
522 *Fisheries, Reviews in Fish Biology and Fisheries* **6**, 349–416 (1996).
- 523 13. Mank, J. E. Population genetics of sexual conflict in the genomic era. *Nature Reviews*  
524 *Genetics* **18**, 721–730 (2017).
- 525 14. Chaput, G. Overview of the status of Atlantic salmon (*Salmo salar*) in the North  
526 Atlantic and trends in marine mortality. *ICES Journal of Marine Science* **69**, 1538–  
527 1548 (2012).
- 528 15. Erkinaro, J. *et al.* Life history variation across four decades in a diverse population  
529 complex of Atlantic salmon in a large subarctic river. *Canadian Journal of Fisheries*  
530 *and Aquatic Sciences* In press (2018). doi:10.1139/cjfas-2017-0343
- 531 16. Otero, J. *et al.* Contemporary ocean warming and freshwater conditions are related to  
532 later sea age at maturity in Atlantic salmon spawning in Norwegian rivers. *Ecology*

- 533            *and Evolution* **2**, 2192–2203 (2012).
- 534    17.    Crozier, L. G. & Hutchings, J. A. Plastic and evolutionary responses to climate change  
535            in fish. *Evolutionary Applications* **7**, 68–87 (2014).
- 536    18.    Vähä, J.-P., Erkinaro, J., Niemelä, E. & Primmer, C. R. Temporally stable genetic  
537            structure and low migration in an Atlantic salmon population complex: implications  
538            for conservation and management. *Evolutionary Applications* **1**, 137–154 (2008).
- 539    19.    Heinimaa, S. & Heinimaa, P. Effect of the female size on egg quality and fecundity of  
540            the wild Atlantic salmon in the sub-arctic River Teno. *Boreal Environment Research* **9**,  
541            55–62 (2004).
- 542    20.    Jonsson, B., Jonsson, N. & Albretsen, J. Environmental change influences the life  
543            history of salmon *Salmo salar* in the North Atlantic Ocean. *Journal of Fish Biology* **88**,  
544            618–637 (2016).
- 545    21.    Ohlberger, J., Ward, E. J., Schindler, D. E. & Lewis, B. Demographic changes in  
546            Chinook salmon across the Northeast Pacific Ocean. *Fish and Fisheries* **00**, 1–14  
547            (2018).
- 548    22.    Friedland, K. D. *et al.* The recruitment of Atlantic salmon in Europe. *ICES Journal of*  
549            *Marine Science* **66**, 289–304 (2009).
- 550    23.    Frainer, A. *et al.* Climate-driven changes in functional biogeography of Arctic marine  
551            fish communities. *Proceedings of the National Academy of Sciences* **114**, 12202–  
552            12207 (2017).
- 553    24.    Kortsch, S. *et al.* Climate change alters the structure of arctic marine food webs due to  
554            poleward shifts of boreal generalists. *Proceedings of the Royal Society B* **282**,  
555            20151546 (2015).
- 556    25.    Jensen, A. J. Cessation of the Norwegian drift net fishery: changes observed in  
557            Norwegian and Russian populations of Atlantic salmon. *ICES Journal of Marine*  
558            *Science* **56**, 84–95 (1999).
- 559    26.    Kuparinen, A. & Hutchings, J. A. Genetic architecture of age at maturity can generate  
560            either directional or divergent and disruptive harvest-induced evolution. *Philosophical*  
561            *Transactions of the Royal Society B: Biological Sciences* **372**, 20160035 (2016).
- 562    27.    Hjørtnann, D. Ø., Ottersen, G. & Stenseth, N. C. Competition among fishermen and  
563            fish causes the collapse of Barents Sea capelin. *Proceedings of the National Academy*  
564            *of Sciences of the United States of America* **101**, 11679–11684 (2004).
- 565    28.    Ghalambor, C. K., McKay, J. K., Carroll, S. P. & Reznick, D. N. Adaptive versus non-  
566            adaptive phenotypic plasticity and the potential for contemporary adaptation in new  
567            environments. *Functional Ecology* **21**, 394–407 (2007).
- 568    29.    Schindler, D. E. *et al.* Population diversity and the portfolio effect in an exploited  
569            species. *Nature* **465**, 609–12 (2010).
- 570    30.    Vähä, J.-P., Erkinaro, J., Niemelä, E. & Primmer, C. R. Life-history and habitat  
571            features influence the within-river genetic structure of Atlantic salmon. *Molecular*  
572            *ecology* **16**, 2638–54 (2007).

- 573 31. Vähä, J., Erkinaro, J., Falkegård, M., Orell, P. & Niemelä, E. Genetic stock  
574 identification of Atlantic salmon and its evaluation in a large population complex.  
575 *Canadian Journal of Fisheries and Aquatic Sciences* **12**, 1–12 (2016).
- 576 32. ICES. Report of the Baltic salmon and trout assessment working group (WGBAST).  
577 3–12 (2013).
- 578 33. Pritchard, V. L. *et al.* Genomic signatures of fine-scale local selection in atlantic  
579 salmon suggest involvement of sexual maturation, energy homeostasis, and immune  
580 defence-related genes. *Molecular Ecology* In press (2018). doi:10.1111/mec.14705
- 581 34. ICES. Report of the Workshop on Age Determination of Salmon (WKADS). ICES  
582 Document CM 2011/ACOM:44 66pp. 18–20 (2011).
- 583 35. Niemelä, E. *et al.* Temporal variation in abundance, return rate and life histories of  
584 previously spawned Atlantic salmon in a large subarctic river. *Journal of Fish Biology*  
585 **68**, 1222–1240 (2006).
- 586 36. Niemelä, E. *et al.* Previously spawned Atlantic salmon ascend a large subarctic river  
587 earlier than their maiden counterparts. *Journal of Fish Biology* **69**, 1151–1163 (2006).
- 588 37. Aykanat, T., Pritchard, V. L., Lindqvist, M. & Primmer, C. R. From population  
589 genomics to conservation and management: a workflow for targeted analysis of  
590 markers identified using genome-wide approaches in Atlantic salmon. *Journal of Fish*  
591 *Biology* **89**, 2658–2679 (2016).
- 592 38. Falush, D., Stephens, M. & Pritchard, J. K. Inference of population structure using  
593 multilocus genotype data: Linked loci and correlated allele frequencies. *Genetics* **164**,  
594 1567–1587 (2003).
- 595 39. Evanno, G., Regnaut, S. & Goudet, J. Detecting the number of clusters of individuals  
596 using the software STRUCTURE: A simulation study. *Molecular Ecology* **14**, 2611–  
597 2620 (2005).
- 598 40. Earl, D. A. & vonHoldt, B. M. STRUCTURE HARVESTER: A website and program  
599 for visualizing STRUCTURE output and implementing the Evanno method.  
600 *Conservation Genetics Resources* **4**, 359–361 (2012).
- 601 41. Goudet, J., Raymond, M., De Meeüs, T. & Rousset, F. Testing differentiation in  
602 diploid populations. *Genetics* **144**, 1933–1940 (1996).
- 603 42. Wood, S. N. Fast stable restricted maximum likelihood and marginal likelihood  
604 estimation of semiparametric generalized linear models. *Journal of the Royal*  
605 *Statistical Society. Series B: Statistical Methodology* **73**, 3–36 (2011).
- 606 43. R Core Team. R: The R Project for Statistical Computing. (2017).
- 607 44. Venables, W. N. & Ripley, B. D. *Modern Applied Statistics With S*. (Springer, 2002).
- 608 45. Fox, J. Effect Displays in R for Generalised Linear Models. *Journal of statistical*  
609 *software* **8**, 1–27 (2003).
- 610 46. Tataru, P., Simonsen, M., Bataillon, T. & Hobolth, A. Statistical Inference in the  
611 Wright–Fisher Model Using Allele Frequency Data. *Systematic Biology* **66**, e30–e46

- 612 (2017).
- 613 47. Wright, S. Evolution in mendelian populations. *Genetics* **16**, 97–159 (1931).
- 614 48. Fisher, R. A. *The Genetical Theory Of Natural Selection*. (Oxford: Clarendon, 1930).
- 615 49. Brooks, S. P. B. & Gelman, A. G. General methods for monitoring convergence of  
616 iterative simulations. *Journal of computational and graphical statistics* **7**, 434–455  
617 (1998).
- 618 50. Lenth, R. V. Least-Squares Means: The R Package **lsmeans**. *Journal of Statistical*  
619 *Software* **69**, (2016).
- 620 51. Gompert, Z. Bayesian inference of selection in a heterogeneous environment from  
621 genetic time-series data. *Molecular Ecology* **25**, 121–134 (2016).
- 622 52. Foll, M., Shim, H. & Jensen, J. D. WFABC: A Wright-Fisher ABC-based approach for  
623 inferring effective population sizes and selection coefficients from time-sampled data.  
624 *Molecular Ecology Resources* **15**, 87–98 (2015).
- 625 53. Waples, R. S. A bias correction for estimates of effective population size based on  
626 linkage disequilibrium at unlinked gene loci. *Conservation Genetics* **7**, 167–184  
627 (2006).
- 628 54. Do, C. *et al.* NeEstimator v2: Re-implementation of software for the estimation of  
629 contemporary effective population size ( $N_e$ ) from genetic data. *Molecular Ecology*  
630 *Resources* **14**, 209–214 (2014).
- 631 55. Waples, R. S. & Yokota, M. Temporal estimates of effective population size in species  
632 with overlapping generations. *Genetics* **175**, 219–233 (2007).
- 633 56. Belgorodski, N., Greiner, M., Tolksdorf, K. & Schueller, K. riskDistributions: Fitting  
634 Distributions to Given Data or Known Quantiles. R package version 2.0. *R Found.*  
635 *Stat. Comput., Vienna*. (2017).
- 636 57. Allendorf, F. W. & Luikart, G. *Conservation and the genetics of populations*.  
637 (Blackwell Pub, 2007).
- 638 58. Plummer, M. JAGS Version 4.3.0 user manual. (2017).
- 639 59. Burnham, K. P., Anderson, D. R. & Burnham, K. P. *Model selection and multimodel*  
640 *inference : a practical information-theoretic approach*. (Springer, 2002).
- 641 60. Kinnison, M. T. & Hendry, A. P. The pace of modern life. II. From rates to pattern and  
642 process. *Genetica* **112–113**, 145–164 (2001).

## 643 **Acknowledgements**

644 We thank numerous fishers who participated in the collection of scales and phenotypic  
645 information, Eero Niemelä for starting the program and looking after contacts with fishers  
646 over the 40 year study period, Jorma Kuusela for organizing the samples collection from the  
647 archive and several scale readers, especially Jari Haantie. This project received funding from  
648 the European Research Council (ERC) under the European Union's Horizon 2020 research  
649 and innovation programme (grant agreement No 742312) as well as from the Academy of  
650 Finland (projects No. 284941, 286334, 307593, 302873 and 318939)

## 651 **Author contributions**

652 J.E and P.O. coordinated the collection of samples; C.R.P., Y.C., T.A. and J.E. designed the  
653 study; Y.C. analyzed the data; Y.C., C.P. and T.A. wrote the manuscript and all authors  
654 contributed to its revision.

## 655 **Competing interests**

656 The authors declare no competing financial interests.

657 Correspondence and requests for materials should be addressed to C.R.P.

658

659

660

661

662

663
